# Supplementary material for: Designed synthesis of large-pore mesoporous silica–zirconia thin films with high mixing degree and tunable cubic or 2D-hexagonal mesostructure
Source: Royal Society of Chemistry journal article supplement (doi:10.1039/b316033e), 2004-01-01
Supplement: b316033e.doc [file b316033e.doc]

**Supplementary Information**, Soler-Illia et al. Mixed Si-Zr MP Thin films


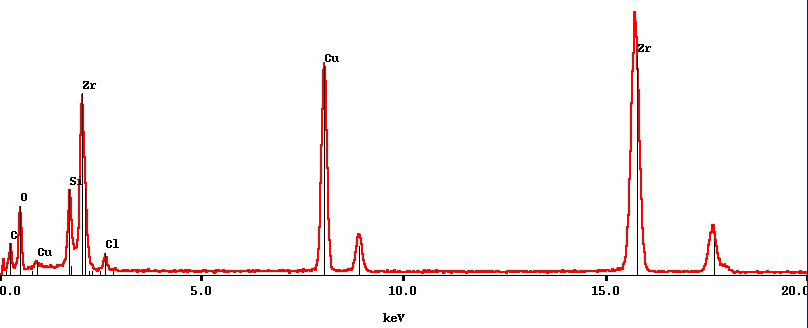


SI Figure 1. EDS spectrum of an F127-templated ZrO2/SiO2 film (*fSi*=0.25; 150ºC); A ZrO2/SiO2 relationship of 74±1/26±1 is obtained.

SI Figure 2. TEM image and EDS spectra of an F127-templated ZrO2/SiO2 film (*fSi*=0.75; 150ºC); upper curve: mesostructured continuous background; lower curve: dense particles. The area ratio of the Si and Zr peaks is indicated in each spectrum.
